# Supplementary material for: Model Communities Hint at Promiscuous Metabolic Linkages between Ubiquitous Free-Living Freshwater Bacteria
Source: PubMed Central journal article supplement (PMC5976882; doi:10.1128/msphere.00202-18), 2018-05-30
Supplement: sph003182557sf1.pdf [file sph003182557sf1.pdf]

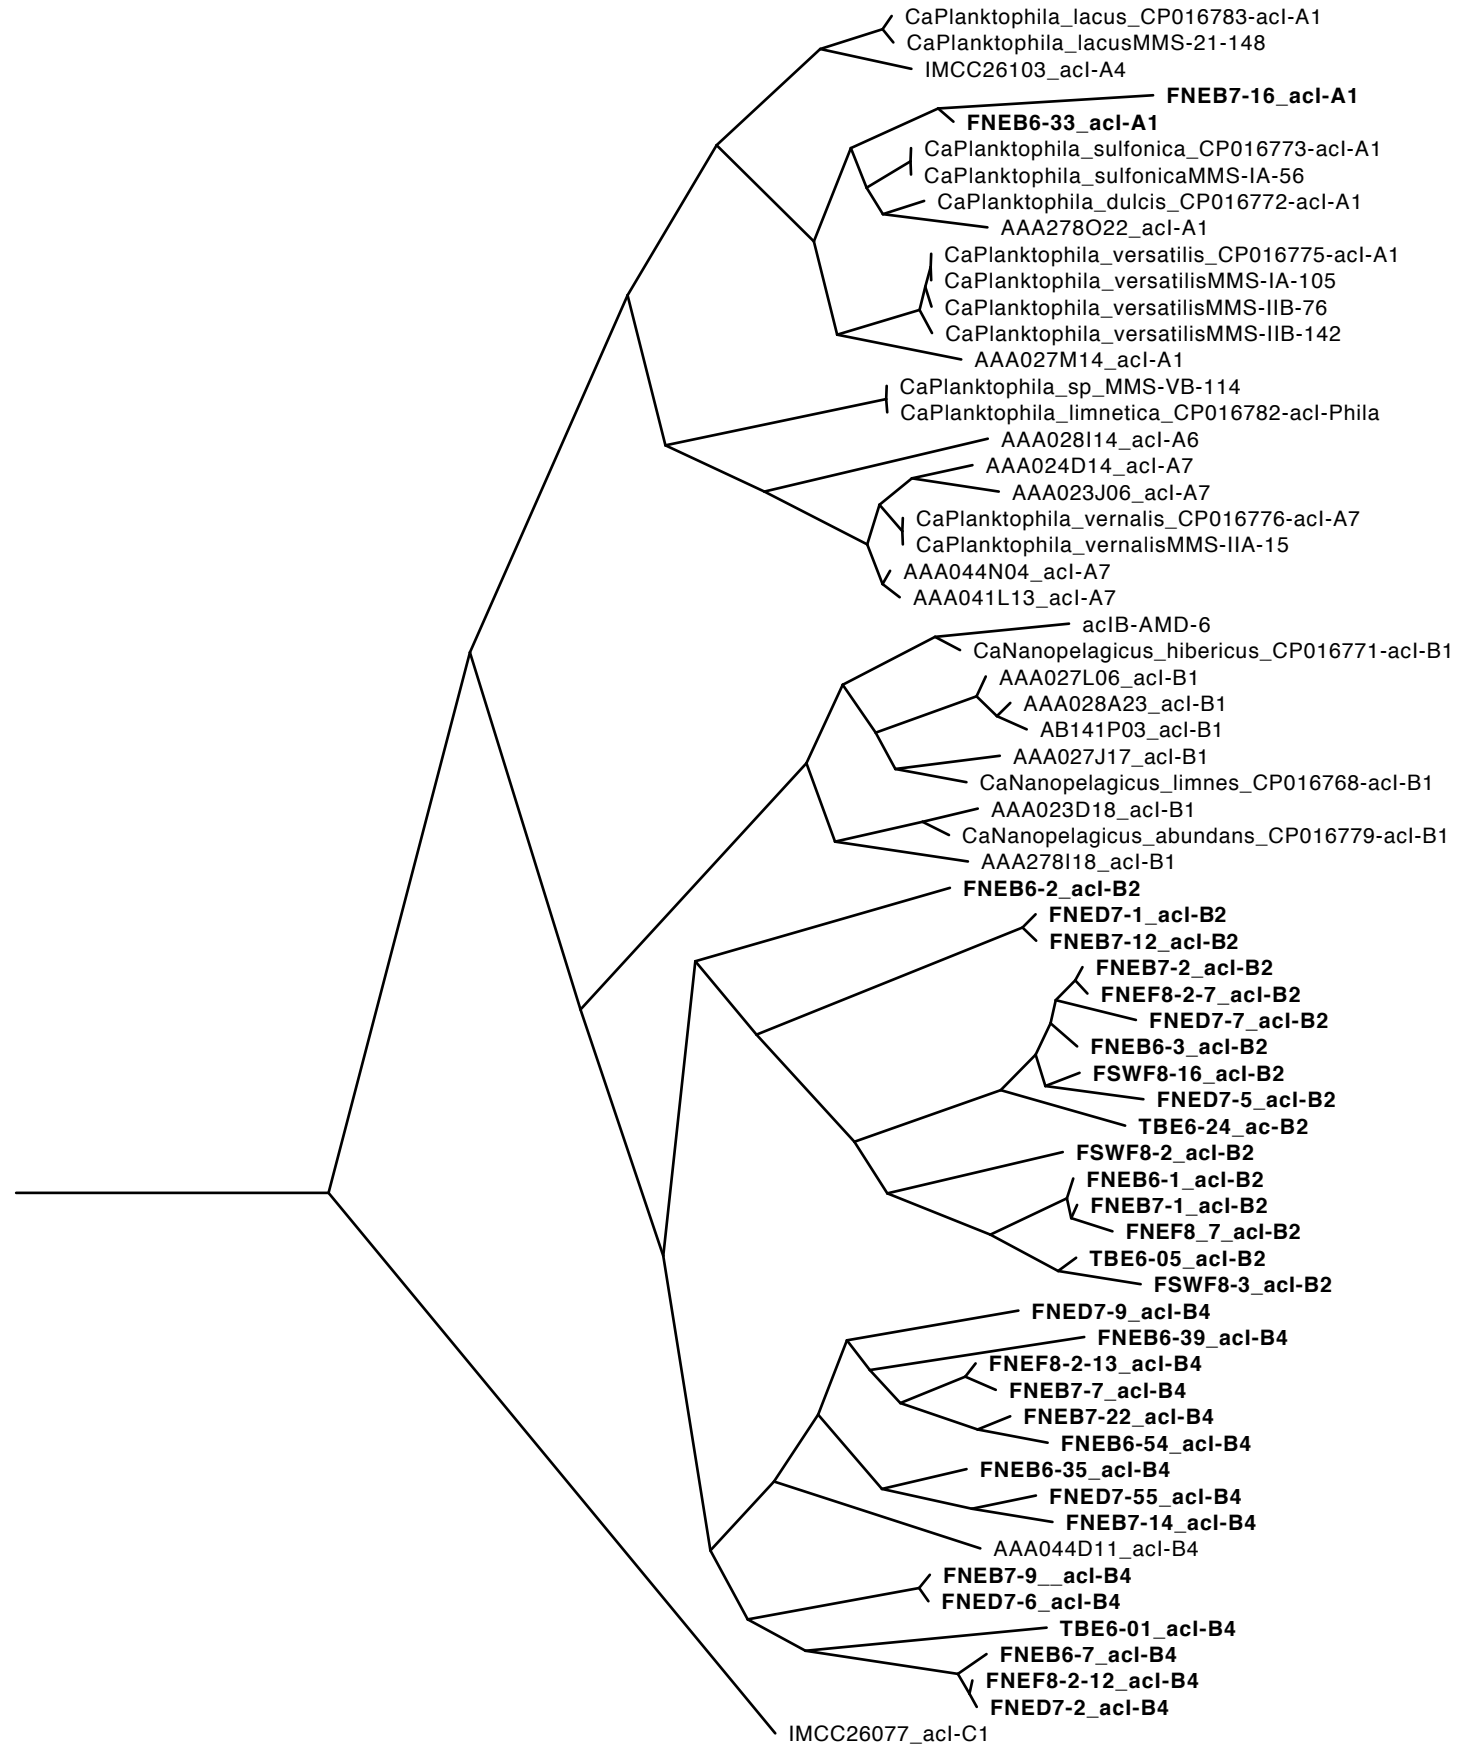

0.09
